# Supplementary material for: Enhancement of electrocatalytic abilities toward CO2 reduction by tethering redox-active metal complexes to the active site
Source: Royal Society of Chemistry journal article supplement (doi:10.1039/d1dt02318g), 2021-01-01
Supplement: d1dt02318g1.pdf [file d1dt02318g1.pdf]

## Supporting Information

Enhancement of eletrocatalytic abilities toward CO<sub>2</sub> reduction by tethering redox-active metal complexes to the active site.

Habib Md. Ahsan<sup>1,2</sup>, Brian K. Breedlove<sup>1,\*</sup>, Cosquer Goulven<sup>3</sup> Masahiro Yamashita<sup>1,4</sup>

<sup>1</sup>Department of Chemistry, Graduate School of Science, Tohoku University, 6-3 Aza-Aoba, Aramaki, Sendai 980-8578, Japan

<sup>2</sup>Chemistry Discipline, Science, Engineering and Technology School, Khulna University, Khulna-9208, Bangladesh.

<sup>3</sup>Chemistry Department, Graduate School of Science, Hiroshima University, 1-3-1, Kagamiyama, Higashihiroshima, Hiroshima, 739-8526, Japan

<sup>4</sup>School of Materials Science and Engineering, Nankai University, Tiajin 300350, China

## Contents and page

|     |                                                                                                                      |     |
|-----|----------------------------------------------------------------------------------------------------------------------|-----|
| 1.  | <sup>1</sup> H NMR spectrum of (pic <sub>4</sub> cyclen).....                                                        | 3   |
| 2.  | <sup>13</sup> C NMR spectrum of (pic <sub>4</sub> cyclen).....                                                       | 4   |
| 3.  | <sup>1</sup> H NMR spectrum of (bn <sub>4</sub> cyclen).....                                                         | 5   |
| 4.  | <sup>13</sup> C NMR spectrum of (bn <sub>4</sub> cyclen).....                                                        | 6   |
| 5.  | ORTEP diagram of (pic) <sub>4</sub> cyclen.....                                                                      | 7   |
| 6.  | Crystal data for (pic) <sub>4</sub> cyclen.....                                                                      | 8   |
| 7.  | ESI-Mass of {[Ru]pic <sub>4</sub> cyclen} <sup>4+</sup> .....                                                        | 9   |
| 8.  | Crystal data for [bn <sub>4</sub> cyclenNiCl]Cl.....                                                                 | 10  |
| 9.  | Comparison of the coordination geometry of the Ni ion in [bn <sub>4</sub> cyclenNiCl]Cl.....                         | 10  |
| 10. | The diffusion coefficient calculation.....                                                                           | 11– |
|     | 12                                                                                                                   |     |
| 11. | Cyclic voltammograms of {[Ru]pic <sub>4</sub> cyclen}NiCl] <sup>5+</sup> at different scan rates.....                | 11  |
| 12. | Plot of <i>i</i> <sub>p</sub> vs. <i>v</i> <sup>1/2</sup> for {[Ru]pic <sub>4</sub> cyclen}NiCl] <sup>5+</sup> ..... | 12  |
| 13. | FTIR spectroscopy.....                                                                                               | 13  |
| 14. | CPE experiment trace.....                                                                                            | 14  |
| 15. | Cyclic voltammogram of [Ru(bpy) <sub>2</sub> Cl] <sup>+</sup> ([Ru]).....                                            | 15  |
| 16. | Cyclic voltammogram of 1:4 [bn <sub>4</sub> cyclenNiCl]Cl and Ru(bpy) <sub>2</sub> Cl <sub>2</sub> .....             | 16  |

|                                                                   |     |
|-------------------------------------------------------------------|-----|
| 17. Comparison of CO <sub>2</sub> reduction electrocatalysts..... | 17  |
| 18. Experimental                                                  | TOF |
| calculation.....                                                  | 18  |
| 19. References.....                                               | 18  |

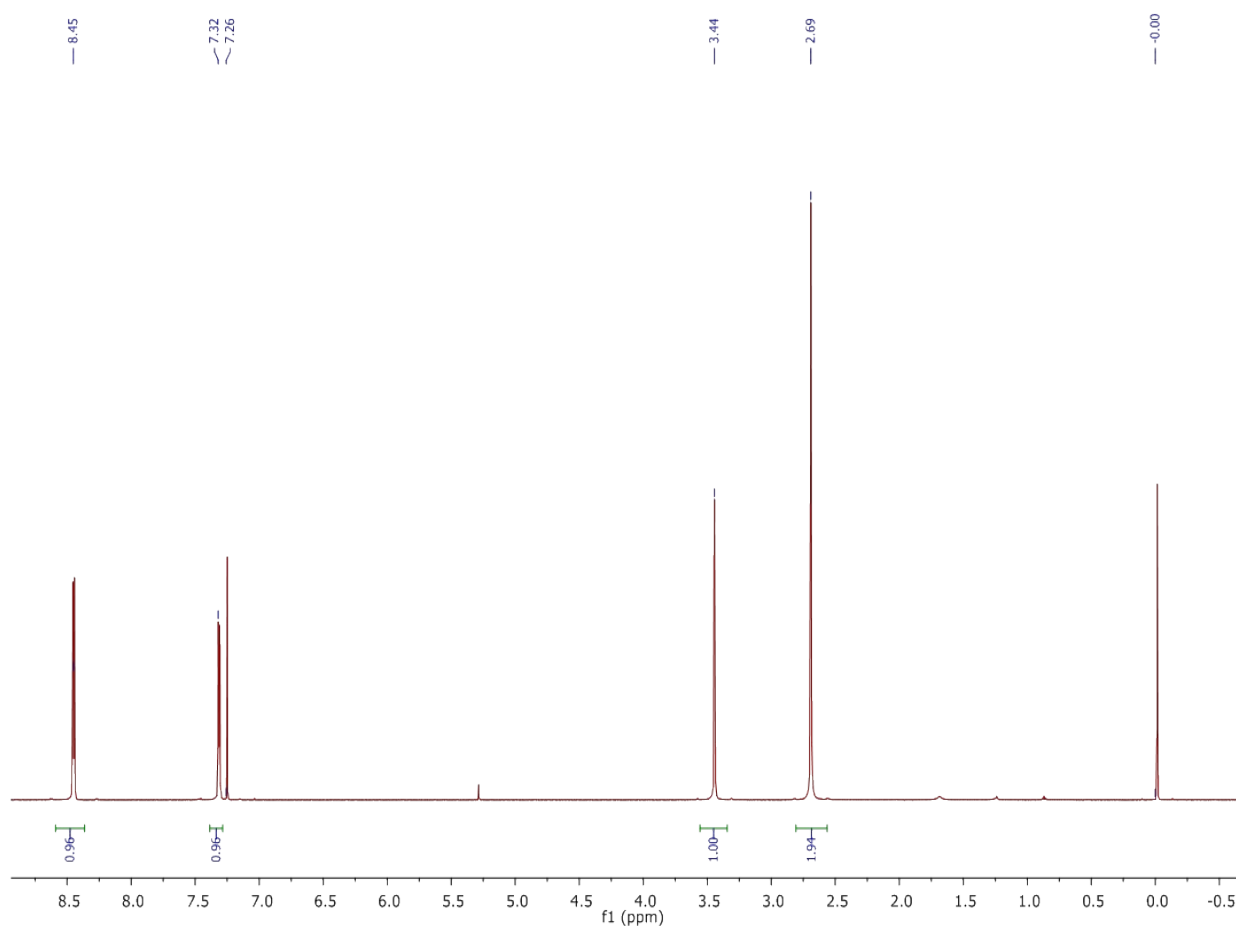

Fig. S1. <sup>1</sup>H NMR spectrum of (pic<sub>4</sub>)cyclen

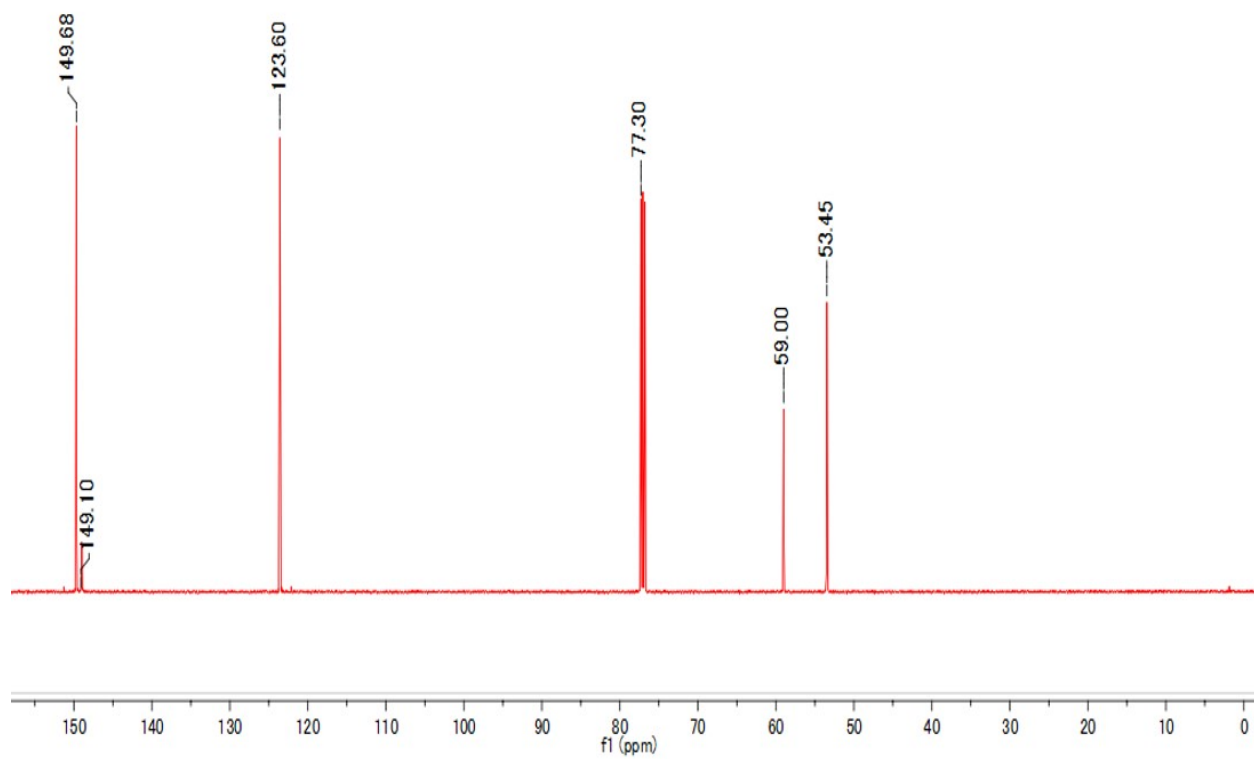

Fig. S2.  $^{13}\text{C}$  NMR spectrum of (pic<sub>4</sub>cyclen)

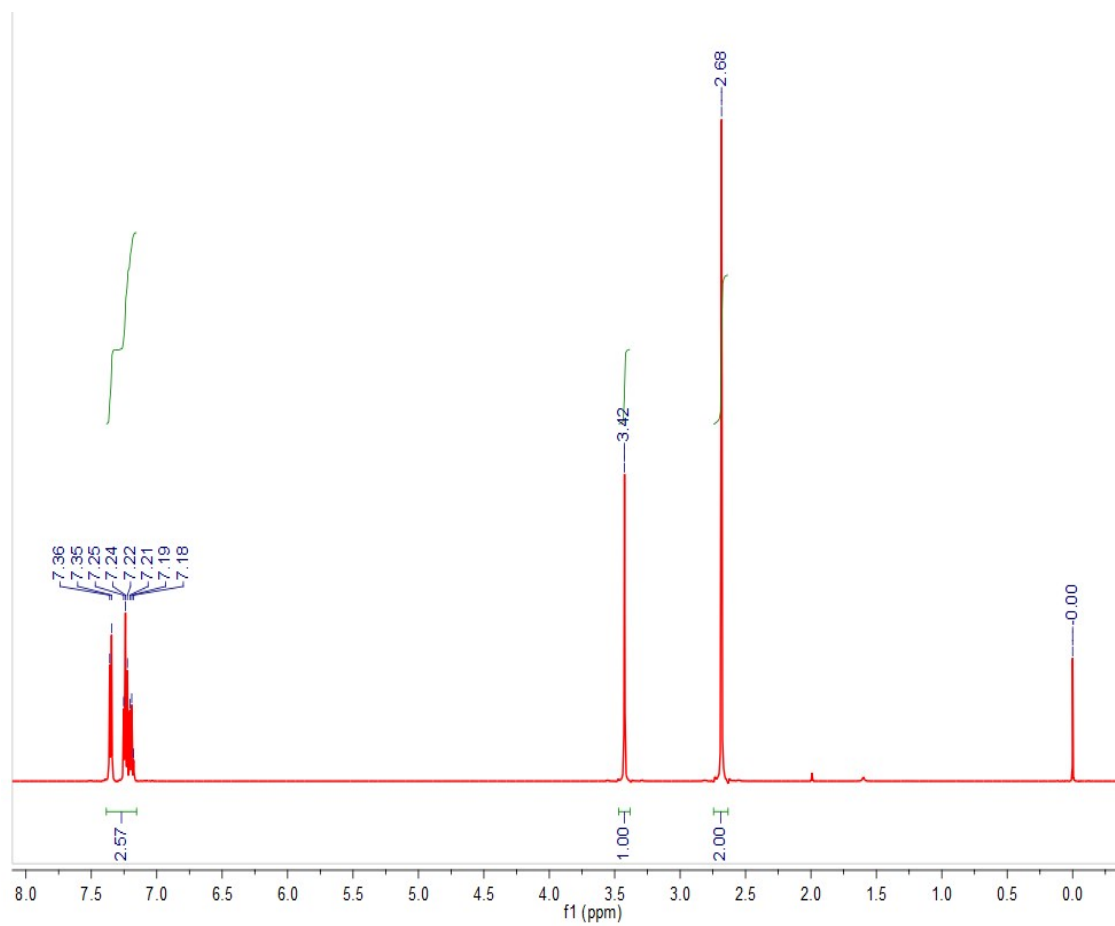

Fig. S3. <sup>1</sup>H NMR spectrum of (bn<sub>4</sub>cyclen)

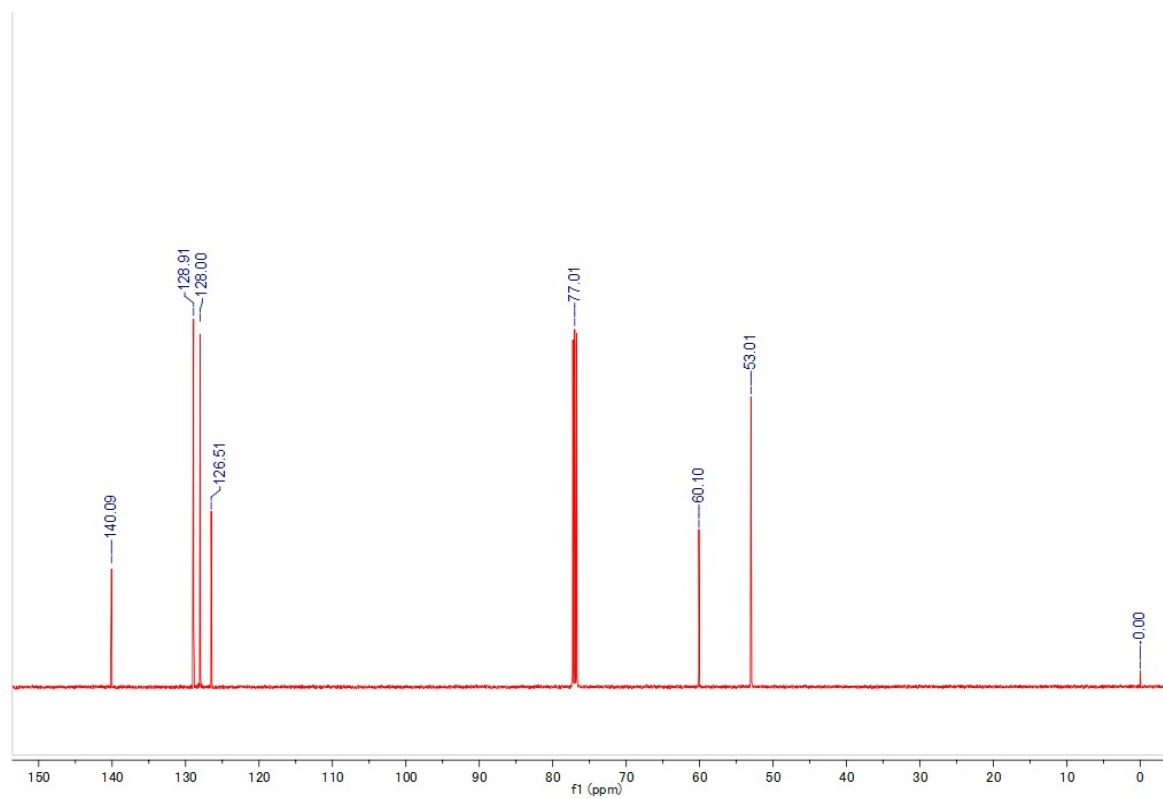

Fig. S4. <sup>13</sup>C NMR spectrum of (bn<sub>4</sub>cyclen)

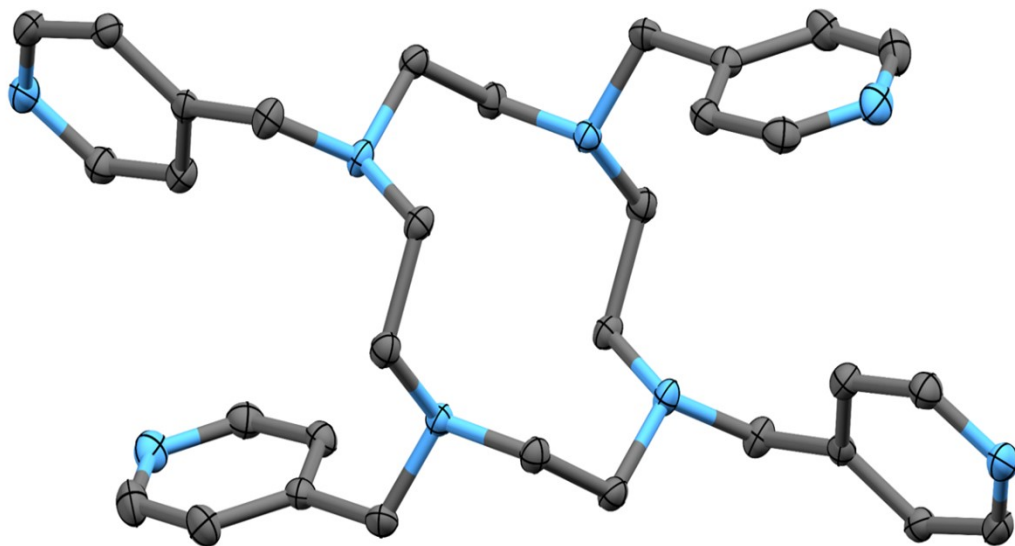

Fig. S5. ORTEP diagram of (pic)<sub>4</sub>cyclen with thermal ellipsoids drawn at the 50% probability. Hydrogen atoms are omitted for clarity. Blue, N; gray, C.

**Table S1. Crystal data for (pic)<sub>4</sub>cyclen.**

|                                                                                      |                                                |
|--------------------------------------------------------------------------------------|------------------------------------------------|
| Radiation type, wavelength                                                           | Mo K $\alpha$ , 0.71073                        |
| Formula                                                                              | C <sub>32</sub> H <sub>40</sub> N <sub>8</sub> |
| Formula weight                                                                       | 536.72                                         |
| Crystal system                                                                       | Triclinic                                      |
| Space group                                                                          | <i>P</i> -1                                    |
| <i>a</i> (Å)                                                                         | 9.328(6)                                       |
| <i>b</i> (Å)                                                                         | 9.338(5)                                       |
| <i>c</i> (Å)                                                                         | 10.156(6)                                      |
| $\alpha$ (deg)                                                                       | 95.874(3)                                      |
| $\beta$ (deg)                                                                        | 116.949(5)                                     |
| $\gamma$ (deg)                                                                       | 108.364(5)                                     |
| <i>V</i> (Å <sup>3</sup> )                                                           | 716.3(7)                                       |
| <i>Z</i>                                                                             | 1                                              |
| <i>T</i> (K)                                                                         | 93                                             |
| <i>d</i> (g/cm <sup>3</sup> )                                                        | 1.244                                          |
| $\mu$ (mm <sup>-1</sup> )                                                            | 0.077                                          |
| <i>R</i> <sub>1</sub> , <i>wR</i> <sub>2</sub> [ <i>I</i> > 2 $\sigma$ ( <i>I</i> )] | 0.0463                                         |
| <i>R</i> <sub>1</sub> , <i>wR</i> <sub>2</sub> [all data]                            | 0.1605                                         |
| <i>R</i> <sub>int</sub>                                                              | 0.0290                                         |
| <i>F</i> (000)                                                                       | 288                                            |
| GOF                                                                                  | 1.046                                          |



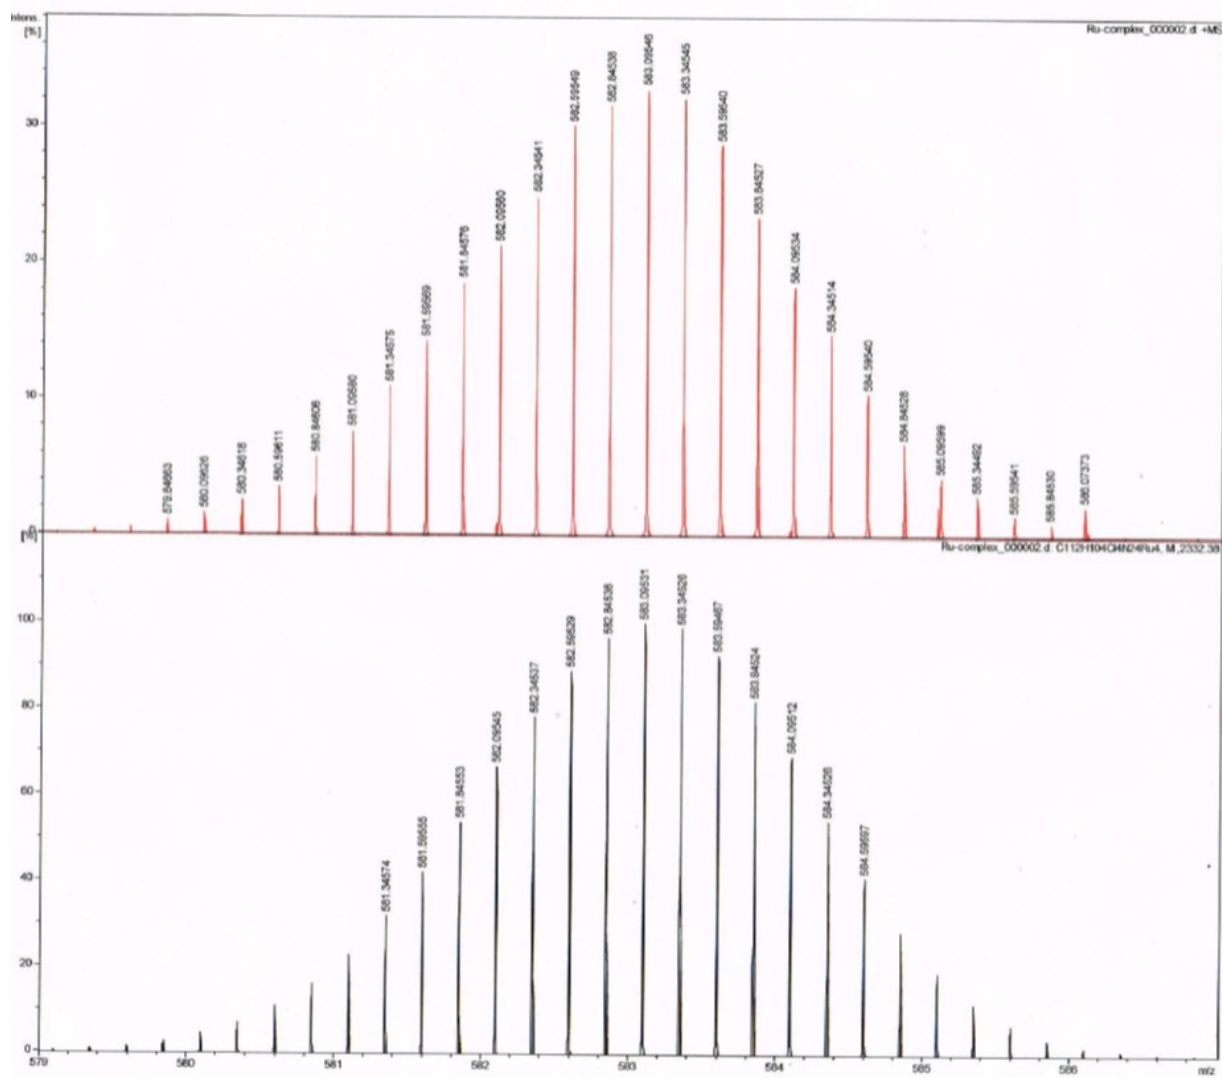

Fig. S6. ESI-Mass of  $[(Ru]pic)_4cyclen]^{4+}$

**Table S2. Crystal data for [bn<sub>4</sub>cyclenNiCl]Cl.**

|                                                                                      |                                                                  |
|--------------------------------------------------------------------------------------|------------------------------------------------------------------|
| Radiation type, wavelength (nm)                                                      | Mo K $\alpha$ , 0.71073                                          |
| Formula                                                                              | C <sub>36</sub> H <sub>44</sub> N <sub>4</sub> NiCl <sub>2</sub> |
| Formula weight                                                                       | 662.36                                                           |
| Crystal system                                                                       | Orthorhombic                                                     |
| Space group                                                                          | <i>Ccm2</i> <sub>1</sub>                                         |
| <i>a</i> (Å)                                                                         | 7.7774(8)                                                        |
| <i>b</i> (Å)                                                                         | 25.294(3)                                                        |
| <i>c</i> (Å)                                                                         | 16.4763(17)                                                      |
| $\alpha$ (deg)                                                                       | 90                                                               |
| $\beta$ (deg)                                                                        | 90                                                               |
| $\gamma$ (deg)                                                                       | 90                                                               |
| <i>V</i> (Å <sup>3</sup> )                                                           | 3241.3(6)                                                        |
| <i>Z</i>                                                                             | 4                                                                |
| <i>T</i> (K)                                                                         | 298(2)                                                           |
| <i>d</i> (g/cm <sup>3</sup> )                                                        | 1.357                                                            |
| $\mu$ (mm <sup>-1</sup> )                                                            | 0.795                                                            |
| <i>R</i> <sub>1</sub> , <i>wR</i> <sub>2</sub> [ <i>I</i> > 2 $\sigma$ ( <i>I</i> )] | 0.0530, 0.1327                                                   |
| <i>R</i> <sub>1</sub> , <i>wR</i> <sub>2</sub> [all data]                            | 0.0714, 0.1428                                                   |
| <i>F</i> (000)                                                                       | 1400                                                             |
| GOF                                                                                  | 0.998                                                            |

**Table S3: Comparison of the coordination geometry of the Ni ion in [bn<sub>4</sub>cyclenNiCl]Cl to ideal geometries by using Shape 2.1.<sup>1</sup> A smaller value indicates better agreement.**

| Pentagon | Vacant octahedron | Trigonal bipyramid | Spherical square pyramid | Johnson trigonal bipyramid J12 |
|----------|-------------------|--------------------|--------------------------|--------------------------------|
| D5h      | C4v               | D3h                | C4v                      | D3h                            |

|        |       |       |       |       |
|--------|-------|-------|-------|-------|
| 33.267 | 2.854 | 5.429 | 0.181 | 8.959 |
|--------|-------|-------|-------|-------|

### The diffusion coefficient $D$ calculation of $[[\{([Ru]pic)_4cyclen\}NiCl]^{5+}]$

The relationship between the cathodic peak current ( $i_p$ ) and square root of the scan rate is given by the Randles-Sevcik equation for a homogeneous system.<sup>2</sup>

$$i_p = 0.4463n_pFA[cat](n_pFvD/RT)^{1/2} \quad \text{Eq. S1}$$

where  $i_p$  is peak current (A),  $n_p$  is the number of electron(s) involved in the redox system (1 for  $Ni^{II/I}$  redox process),  $F$  is the Faraday constant ( $96500 \text{ C}\cdot\text{mol}^{-1}$ ),  $A$  is the surface area of working electrode ( $0.071 \text{ cm}^2$ ),  $[cat]$  is catalysts concentration ( $\text{mol}\cdot\text{cm}^{-3}$ ),  $v$  is the scan rate ( $\text{V}\cdot\text{s}^{-1}$ ),  $R$  is the

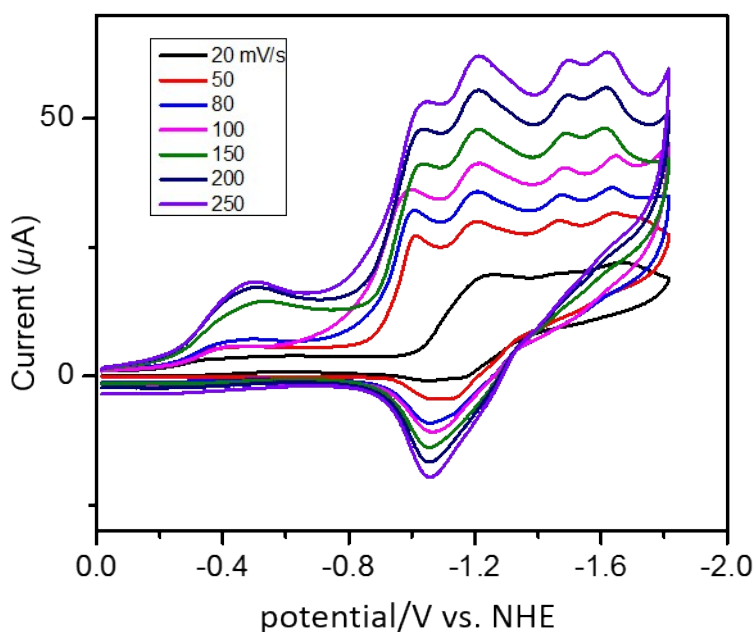

Fig. S7. Cyclic voltammograms of  $[[\{([Ru]pic)_4cyclen\}NiCl]^{5+}]$  in  $CH_3CN$  containing  $0.1 \text{ M TBAPF}_6$  at different scan rates. The  $Ni^{II/I}$  couple was used as the cathodic peak current.

universal gas constant ( $8.31 \text{ J}\cdot\text{K}^{-1}\cdot\text{mol}^{-1}$ ), and  $T$  is the temperature (298 K). The diffusion coefficient  $D$  is calculated from the slope of  $i_p$  vs.  $v^{1/2}$  plot.

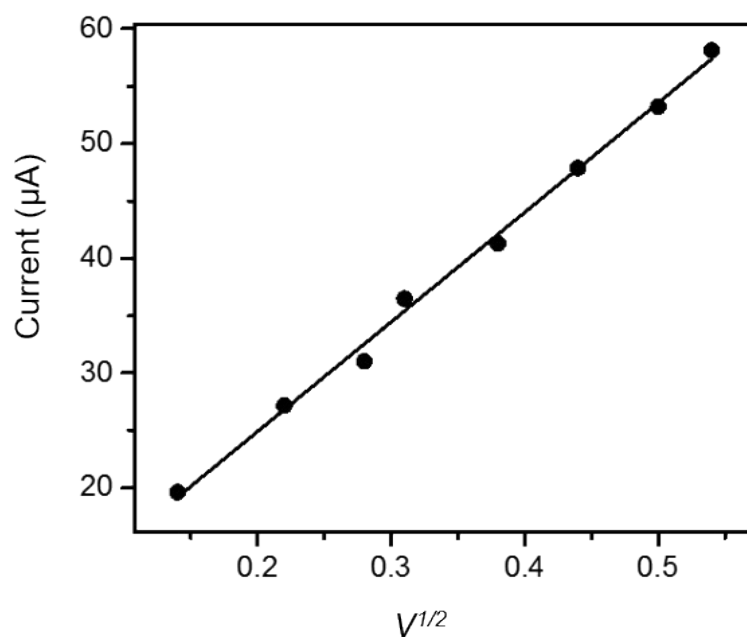

Fig. S8. Plot of  $i_p$  vs.  $v^{1/2}$  for  $\{[(\text{Ru}(\text{pic})_4\text{cyclen})\text{NiCl}]^{5+}$ , data collected from Figure 7. Peak current consider for  $\text{Ni}^{\text{II/I}}$  reduction couples at corresponding scan rate. The current showing a linear dependence on scan rate, indicating that the reduction of  $\{[(\text{Ru}(\text{pic})_4\text{cyclen})\text{NiCl}]^{5+}$  is a diffusion-controlled process.

The diffusion coefficient for  $\{[(\text{Ru}(\text{pic})_4\text{cyclen})\text{NiCl}]^{5+}$  calculated using Eq. S1 to be  $1.95 \times 10^{-5} \text{ cm}^2\cdot\text{s}^{-1}$ .

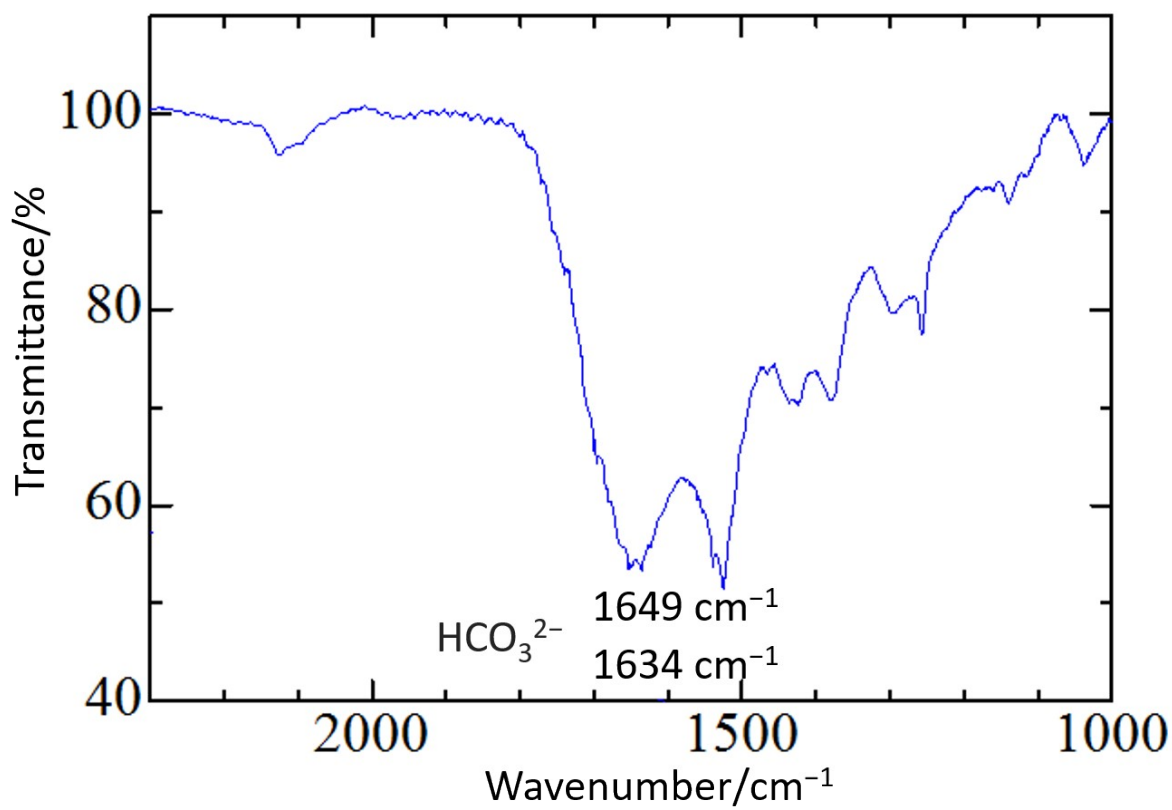

Fig. S9: IR spectroscopy of the solid collected after bulk electrolysis in dry CH<sub>3</sub>CN.

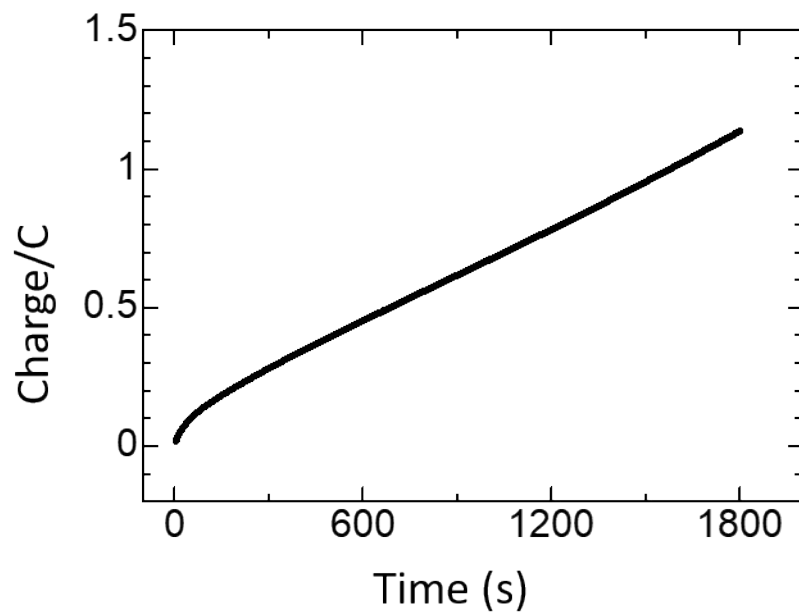

Fig. S10: CPE experiment trace for {{{[Ru]pic)4cyclen}NiCl}5+

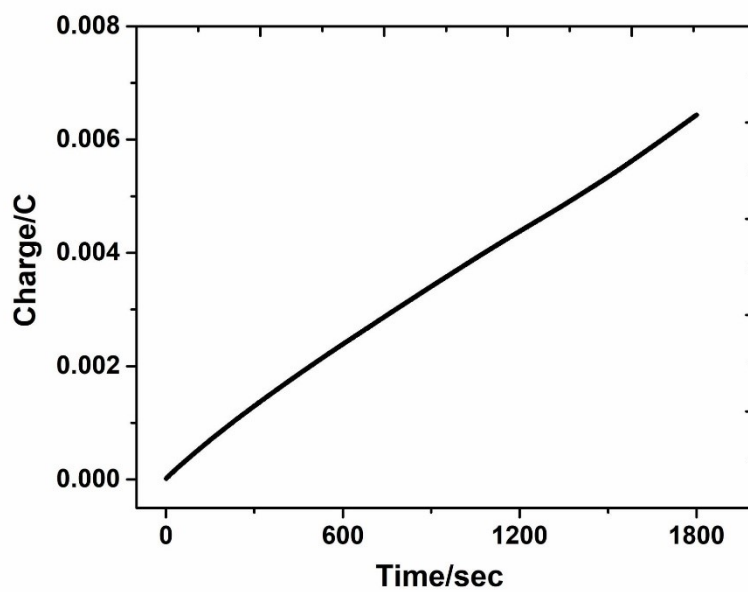

Fig. S11: CPE experiment trace for [bn4cyclenNiCl]Cl

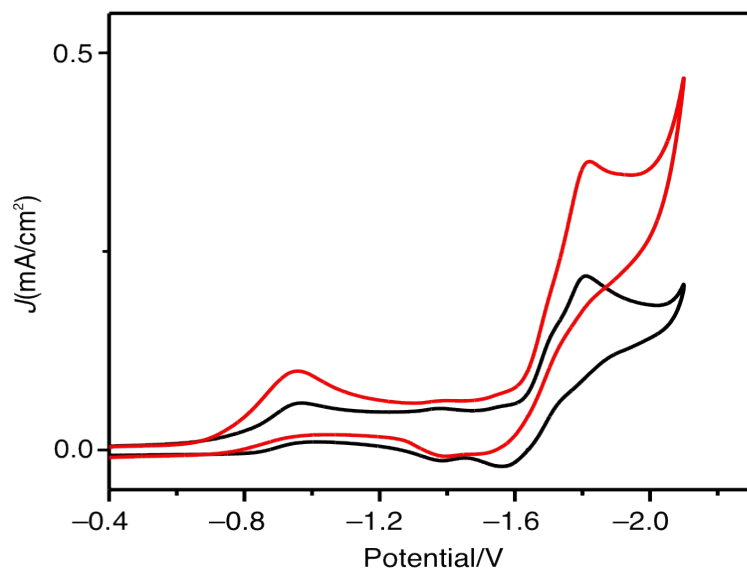

Fig. S12. Cyclic voltammogram of  $[\text{Ru}(\text{bpy})_2\text{Cl}]^+$  ( $[\text{Ru}]$ ) vs. Ag wire under a N<sub>2</sub> atmosphere (black) and a CO<sub>2</sub> atmosphere (red). Although a small increase in the current was observed, it was small.

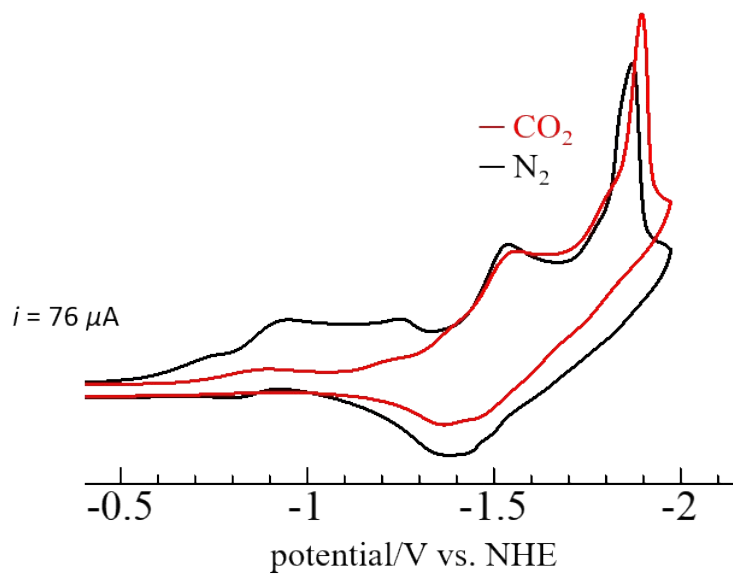

Fig. S13. Cyclic voltammetry of 1:4  $[\text{bn}_4\text{cyclenNiCl}]\text{Cl}$  and  $\text{Ru}(\text{bpy})_2\text{Cl}_2$  under  $\text{N}_2$  (black) and  $\text{CO}_2$  (red) in 95:5 (v/v)  $\text{CH}_3\text{CN}/\text{H}_2\text{O}$ .



**Table S4: Comparison of CO<sub>2</sub> reduction electrocatalysts**

| Entry | Catalyst                                                                            | Major product | FE (%) | TOF(s <sup>-1</sup> ) | $\eta$ (V) | Ref.         |
|-------|-------------------------------------------------------------------------------------|---------------|--------|-----------------------|------------|--------------|
| 1     | $[[\{([Ru]pic)_4cyclen\}NiCl]^{5+}$                                                 | CO            | 80     | 708                   | 0.88       | In this work |
| 2     | $[[\{([Ru]pic)_4cyclen\}NiCl]^{5+}$                                                 | CO            | 84     | 178                   | 0.53       | In this work |
| 3     | $[bn_4cyclenNiCl]Cl$                                                                | CO            | 77     | 8                     | 0.73       | In this work |
| 4     | 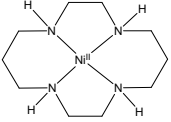   | CO            | 84     | 130                   | 0.55       | 3            |
| 5     |    | CO            | 88     | 100                   | 0.59       | 3            |
| 6     |  | CO            | 88     | 100                   | 0.55       | 3            |
| 7     |  | CO            | 90     | 90                    | 0.88       | 4            |
| 8     |  | CO            | 86     | 190                   | 0.65       | 5            |

## Experimental TOF calculation

The experimental TOF was calculating based on, the total amount of CO generated during control potential electrolysis experiments divided by the total amount of catalyst in solution for electrolysis and then divided by time of control potential electrolysis. The equation given below.

$$TOF = \frac{\frac{n[CO]}{n[cat]}}{t} \quad \text{Eq. S2}$$

Where, n[CO] is the total number of mole CO generate during electrolysis (from GC-MS measurement), n[cat] is the number of moles of catalysts in solution for using for electrolysis and t is the electrolysis time in seconds.

The experimental TOF from bulk electrolysis for  $\{([Ru]pic)_4cyclen\}NiCl^{5+}$  and  $[bn_4cyclenNiCl]Cl$  were calculated to be  $2.64 \text{ s}^{-1}$  and  $0.09 \text{ s}^{-1}$  in 5%  $H_2O/CH_3CN$  system, respectively.

## References

1. S. Alvarez, P. Alemany, D. Casanova, J. Cirera, M. Llunell and D. Avnir, *Coord. Chem. Rev.* 2005, **249**, 1693–1708.
2. W. Nie and C. C. L. McCrory, *Chem. Commun.* 2018, **54**, 1579–1582
3. J. Schneider, H. Jia, K. Kobiro, D. E. Cabelli, J. T. Muckerman and E. Fujita, *Energy Environ. Sci.*, 2012, **5**, 9502–9510.
4. J. D. Froehlich and C.P. Kubiak, *Inorg. Chem.*, 2012, **51**, 3932–3934.
5. G. Neri, I. M. Aldous, J. J. Walsh, L. J. Hardwick and A. J. Cowan, *Chem. Sci.* 2016, **7**, 1521–1526.
